# Supplementary material for: Determination of thermodynamic functions and structural parameters of NpO2+lactate complexes
Source: Royal Society of Chemistry journal article supplement (doi:10.1039/d0nj04291a), 2020-01-01
Supplement: d0nj04291a1.pdf [file d0nj04291a1.pdf]

# Determination of thermodynamic functions and structural parameters of $\text{NpO}_2^+$ lactate complexes

M. M. Maiwald<sup>1\*</sup>, K. Müller<sup>3</sup>, K. Heim<sup>3</sup>, M. Trumm<sup>2</sup>, N. L. Banik<sup>4</sup>, J. Rothe<sup>2</sup>, K. Dardenne<sup>2</sup>, A. Skerencak-Frech<sup>2</sup>, P. J. Panak<sup>1,2</sup>

- 1) Ruprecht Karls Universität Heidelberg, Physikalisch-Chemisches Institut, Im Neuenheimer Feld 253, D-69120 Heidelberg, Germany
- 2) Karlsruher Institut für Technologie (KIT), Institut für Nukleare Entsorgung (INE), D-76344 Eggenstein-Leopoldshafen, Germany
- 3) Helmholtz-Zentrum Dresden-Rossendorf, Institut für Ressourcenökologie, Bautzner Landstraße 400, 01328 Dresden, Germany
- 4) Joint Research Center JRC - Karlsruhe, G.II.6 - Nuclear Safeguards and Forensics, European Commission, P.O.Box 2340, D-76125 Karlsruhe, Germany

\* E-mail: m.maiwald@pci.uni-heidelberg.de

## Supporting Information

### Figures:

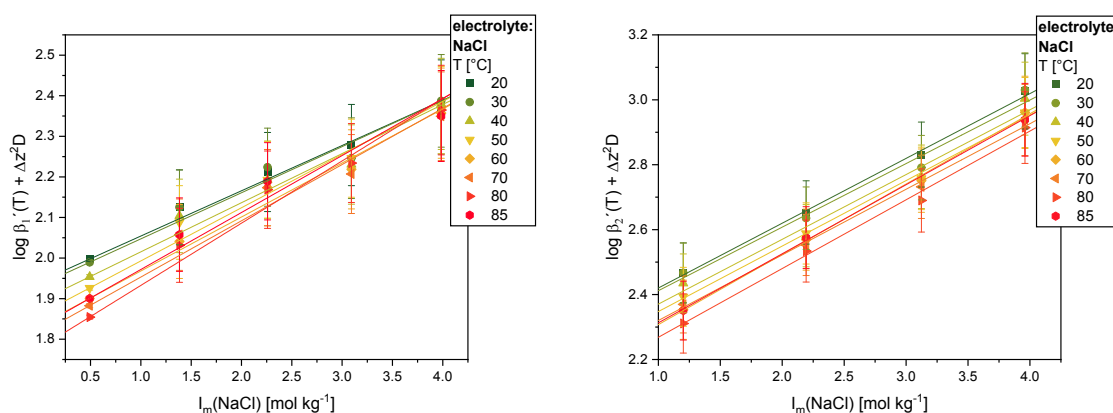

**Figure S1:** Ionic strength dependence of  $\log \beta'_n(T) - \Delta z^2 D$  and linear fitting of the data according to the SIT for the complexation reaction  $\text{NpO}_2^+ + n \text{Lac}^- \rightleftharpoons \text{NpO}_2(\text{Lac})_n^{1-n}$  ( $n = 1, 2$ ) in NaCl.

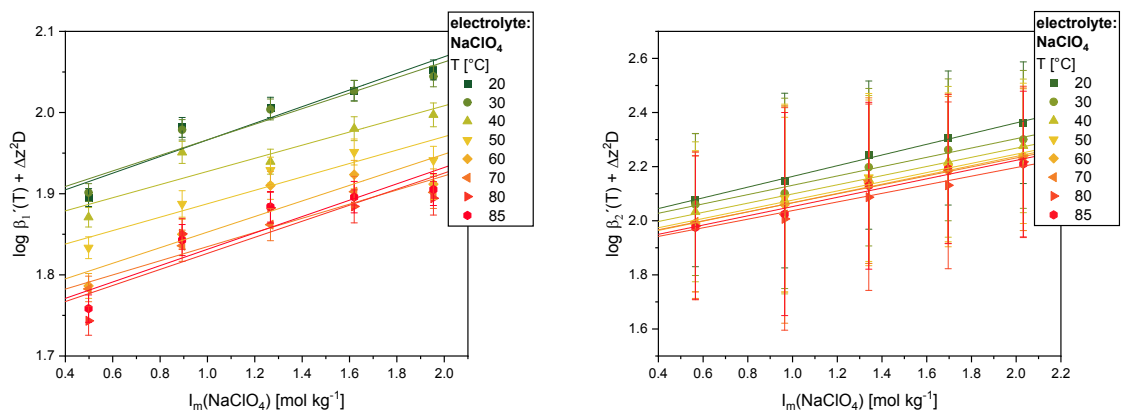

**Figure S2:** Ionic strength dependence of  $\log \beta'_n(T) - \Delta z^2 D$  and linear fitting of the data according to the SIT for the complexation reaction  $\text{NpO}_2^+ + n \text{Lac}^- \rightleftharpoons \text{NpO}_2(\text{Lac})_{n-1-n}$  ( $n = 1, 2$ ) in  $\text{NaClO}_4$ .

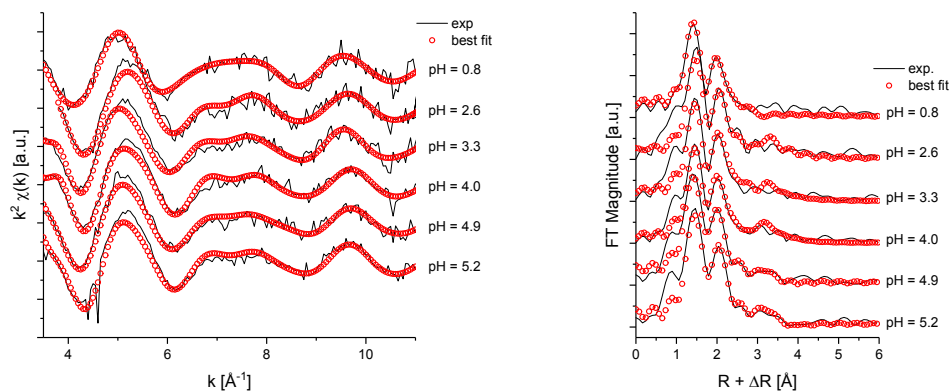

**Figure S3:** Raw  $k^2$ -weighted Np-L<sub>3</sub>-edge EXAFS spectra (left) and related Fourier transforms (right) of  $\text{NpO}_2^+$  in the presence of lactate as a function of the  $\text{pH}_c$  value (black) and the corresponding fit curves (red circles).

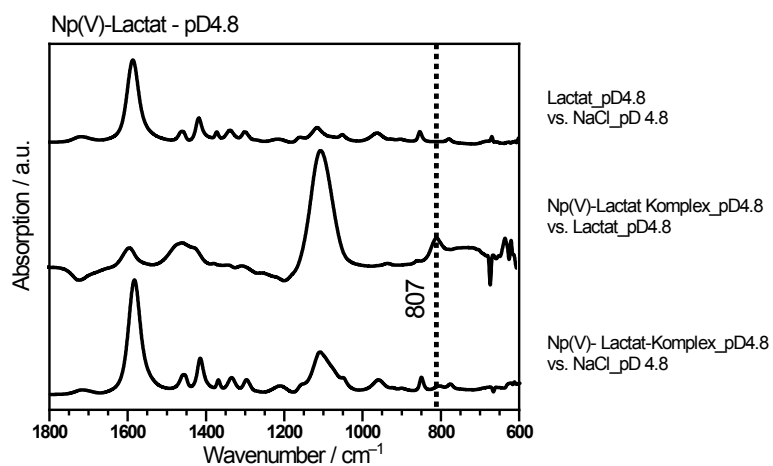

**Figure S4:** ATR-FT infrared spectra of lactic acid as a function of the  $pD_c$  value.  $I_m(\text{NaCl}) = 1.0$ ,  $T = 20^\circ\text{C}$ ,  $[\text{Lac}^-]_{\text{total}} = 0.1 \text{ mol kg}^{-1}$ .

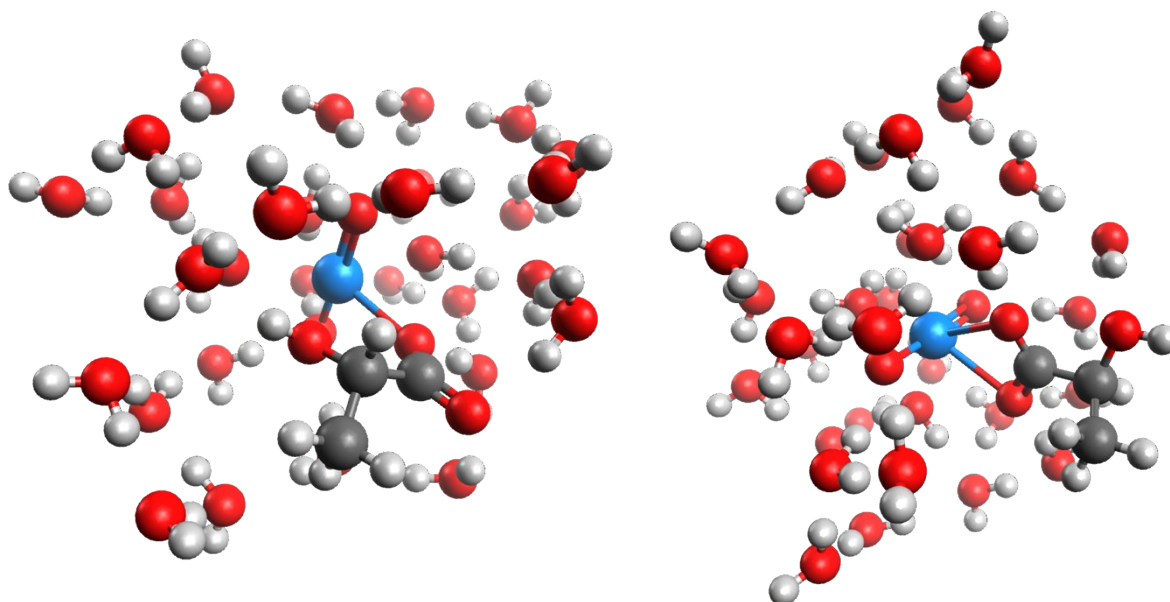

**Figure S5:** Structures of the optimized conformers of the  $\text{NpO}_2(\text{Lac})$  complex with second hydration shell. (left) side-on coordination mode of lactate; (right) end-on coordination mode of lactate.

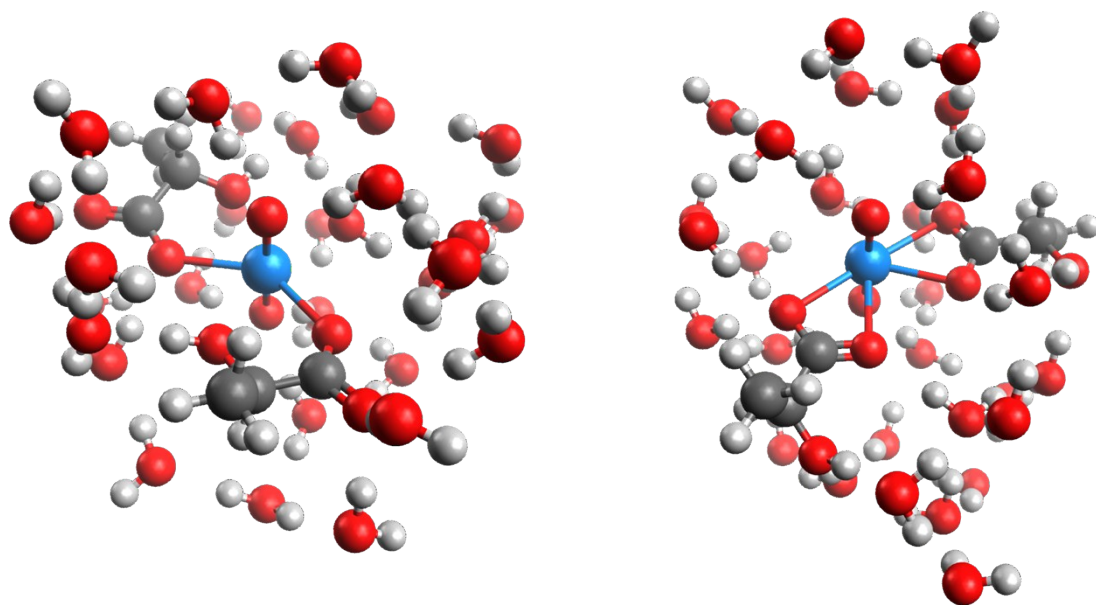

**Figure S6:** Structures of the optimized conformers of the  $\text{NpO}_2(\text{Lac})_2^-$  complex with second hydration shell. (left) side-on coordination mode of lactate; (right) end-on coordination mode of lactate.

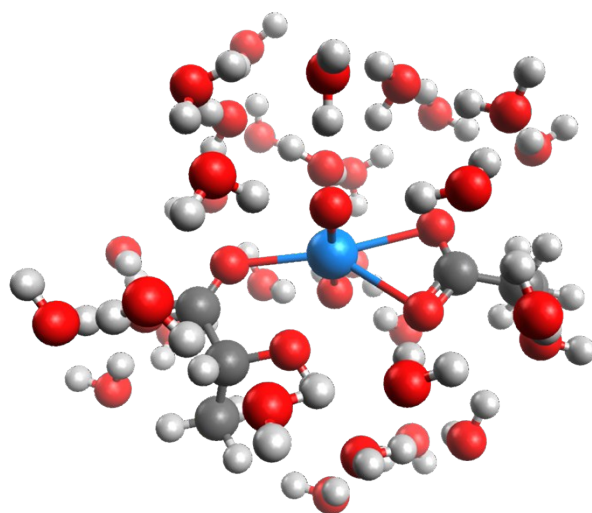

**Figure S7:** Structure of the optimized conformer of the  $\text{NpO}_2(\text{Lac})_2^-$  complex with one end-on and one side-on coordinating lactate and second hydration shell.

## Tables:

**Table S1:** Fit parameters of the raw  $k^2$ -weighted Np-L<sub>3</sub>-edge EXAFS spectra shown in Fig. S1. \* fixed for fitting.

|                             |                                            |              |              |              |              |              |              |
|-----------------------------|--------------------------------------------|--------------|--------------|--------------|--------------|--------------|--------------|
| pH                          |                                            | 5.2          | 4.7          | 4.0          | 3.3          | 2.6          | 0.8          |
| k-weighting                 |                                            | 2            | 2            | 2            | 2            | 2            | 2            |
| O <sub>ax</sub>             | N                                          | 2*           | 2*           | 2*           | 2*           | 2*           | 2*           |
|                             | R / Å                                      | 1.84 (1)     | 1.84 (1)     | 1.84 (1)     | 1.83 (1)     | 1.85 (1)     | 1.83 (1)     |
|                             | $\sigma^2 / \text{Å}^2$                    | 0.00028 (30) | 0.00042 (23) | 0.00034 (36) | 0.00038 (29) | 0.00051 (38) | 0.00066 (60) |
| O <sub>eq</sub>             | N                                          | 4.1 (1)      | 4.2 (1)      | 4.1 (1)      | 4.2 (1)      | 3.1 (1)      | 4.9 (1)      |
|                             | R / Å                                      | 2.48 (1)     | 2.48 (1)     | 2.49 (1)     | 2.49 (1)     | 2.51 (2)     | 2.48 (1)     |
|                             | $\sigma^2 / \text{Å}^2$                    | 0.0067 (14)  | 0.0074 (14)  | 0.0056 (10)  | 0.0067 (17)  | 0.0026 (22)  | 0.0062 (21)  |
| C <sub>c</sub>              | N                                          | 2.5 (1)      | 1.3 (1)      | 1.2 (1)      | 1.1 (1)      | 1.3 (1)      | -            |
|                             | R / Å                                      | 3.23 (2)     | 3.14 (2)     | 3.12 (4)     | 2.81 (4)     | 2.72 (8)     | -            |
|                             | $\sigma^2 / \text{Å}^2$                    | 0.004*       | 0.004*       | 0.004*       | 0.004*       | 0.004*       | -            |
| molar fractions [%]         | <sup>-</sup> NpO <sub>2</sub> <sup>+</sup> | 0            | 0            | 0            | 0            | 24           | 100          |
|                             | NpO <sub>2</sub> (Lac)                     | 47           | 52           | 66           | 72           | 68           | 0            |
|                             | NpO <sub>2</sub> (Lac) <sub>2</sub>        | 53           | 48           | 34           | 28           | 8            | 0            |
| S <sub>0</sub> <sup>2</sup> |                                            | 0.9          | 0.9          | 0.9          | 0.9          | 0.9          | 0.9          |
| $\Delta E_0 / \text{eV}$    |                                            | 12.7 (5)     | 11.9 (4)     | 11.4 (6)     | 11.6 (5)     | 14.1 (5)     | 10.6 (8)     |
| Red error                   |                                            | 0.015083     | 0.0107628    | 0.0254695    | 0.0151136    | 0.0204184    | 0.0486686    |

**Table S2:** Species distribution of the NpO<sub>2</sub>(Lac)<sub>n</sub><sup>1-n</sup> complexes (n = 0 – 2) in the EXAFS samples as a function of the pH<sub>c</sub> value.

| pH  | NpO <sub>2</sub> (H <sub>2</sub> O) <sub>5</sub> <sup>+</sup> | NpO <sub>2</sub> (Lac) | NpO <sub>2</sub> (Lac) <sub>2</sub> <sup>-</sup> |
|-----|---------------------------------------------------------------|------------------------|--------------------------------------------------|
| 0.8 | 1.00                                                          | 0.00                   | 0.00                                             |
| 2.6 | 0.24                                                          | 0.68                   | 0.08                                             |
| 3.3 | 0.00                                                          | 0.72                   | 0.28                                             |
| 4.0 | 0.00                                                          | 0.66                   | 0.34                                             |
| 4.7 | 0.00                                                          | 0.56                   | 0.44                                             |
| 4.9 | 0.00                                                          | 0.52                   | 0.48                                             |
| 5.2 | 0.00                                                          | 0.47                   | 0.53                                             |

## Structural data of the DFT calculations

### xyz data:

Complex species: NpO<sub>2</sub>(Lac) with end-on  
coordinating ligand

|    |            |            |            |   |            |            |            |
|----|------------|------------|------------|---|------------|------------|------------|
| C  | 0.4372701  | 0.7410249  | -5.5807065 | H | 4.8342992  | -1.8104270 | -1.7327562 |
| C  | -0.7757944 | 0.9755630  | -4.6996527 | H | -2.4576621 | -4.3279958 | 0.1000108  |
| O  | -1.2597174 | 2.3023949  | -4.7988973 | H | 5.9459341  | -2.8844197 | -1.6339892 |
| C  | -0.4363311 | 0.7057788  | -3.2509754 | H | -1.5369876 | -4.4657290 | -1.1333538 |
| O  | -0.3530324 | 1.6419802  | -2.4358401 | H | 2.2707513  | -4.2348409 | -1.5798348 |
| Np | 0.0376473  | 0.1809816  | -0.4272225 | H | -4.4391146 | -3.4572044 | -3.0860595 |
| O  | -0.3628443 | 2.4794886  | 0.2744412  | H | 3.7373106  | -3.8759185 | -1.2594103 |
| O  | -0.2359972 | -0.4778123 | -2.9000350 | H | -3.3442710 | -3.4634463 | -1.9960812 |
| O  | 0.2899396  | -0.1138148 | 1.9634408  | H | -0.2544308 | -3.8644109 | -2.9397303 |
| O  | 1.8258573  | 0.4791529  | -0.5805514 | H | -0.7974156 | -1.9720891 | -3.6711297 |
| O  | 0.4463948  | -2.2774498 | -0.2550555 | H | 0.3651559  | -5.2313534 | -2.4790973 |
| O  | -1.7289976 | -0.0822260 | -0.1920266 | H | -2.0321674 | -2.8910221 | -3.7232995 |
| O  | -2.3075453 | 0.2031079  | 2.6960055  | H | 4.4113809  | 0.3903960  | -2.4523052 |
| O  | 2.2388327  | 0.2712539  | 3.6679359  | H | 3.4383159  | -0.1027767 | -1.3671275 |
| O  | 0.6697760  | 3.6531618  | 2.4949097  | H | 0.3690120  | -2.9583116 | -0.9273795 |
| O  | -2.6743720 | 3.6721300  | -0.5440841 | H | 0.9532863  | -2.6685636 | 0.4724618  |
| O  | -3.5124722 | 2.5918487  | -2.8815449 | H | -2.3471758 | -1.5359681 | 3.4233842  |
| O  | -1.0913071 | -2.8586048 | -3.9255878 | H | 2.4599500  | -4.0907074 | 0.6579827  |
| O  | 0.1723874  | -4.3457522 | -2.1886202 | H | -1.3659217 | -2.5618697 | 4.0723152  |
| O  | 3.3521460  | 2.6982578  | 2.7629402  | H | 1.4150650  | -4.4656122 | 1.7752551  |
| O  | 2.9180466  | -2.4214985 | 3.6308892  | H | -3.2151613 | -4.9421611 | 2.2641555  |
| O  | 2.0011626  | -3.7689443 | 1.4577436  | H | 3.6637586  | -2.8826918 | 3.9997980  |
| O  | 2.9797283  | -4.4046255 | -0.9620779 | H | -2.4079585 | -3.6495378 | 2.5406435  |
| O  | 4.3647854  | -0.1246978 | -1.6329345 | H | 2.7003462  | -2.8640289 | 2.7918366  |
| O  | 5.0119739  | -2.7662137 | -1.7595306 | H | 0.0751918  | -6.3445836 | 2.7705438  |
| O  | -1.7875392 | 2.8476962  | 3.6651822  | H | 0.3087903  | -4.0802982 | 4.0824572  |
| O  | -3.2464910 | 4.3799587  | 2.0850254  | H | -0.8499841 | -5.1737038 | 2.3534702  |
| O  | -2.1415648 | 6.3146597  | 0.3493807  | H | 1.1088341  | -2.8355396 | 4.4546126  |
| O  | -3.5846722 | -0.1148900 | -2.3322167 | H | -2.2762791 | 1.1079195  | 3.0296438  |
| O  | 0.0561733  | -5.4048514 | 2.6232943  | H | -2.4837887 | 0.2370784  | 1.7519237  |
| O  | -2.4367887 | -4.4690140 | 1.9859649  | H | -1.1806078 | 2.9290014  | -0.0106036 |
| O  | -2.2258925 | -2.4638576 | 3.6417134  | H | -0.0131922 | 2.8948160  | 1.0748365  |
| O  | 0.2622385  | -3.2659264 | 4.5857339  | H | 3.9798463  | 3.2960807  | 3.1553623  |
| O  | 0.6707482  | 4.1981570  | -2.2963644 | H | -3.3692135 | 3.8896546  | 1.2661372  |
| O  | 0.4165976  | 5.6059303  | 0.2387380  | H | 3.6228169  | 2.5632137  | 1.8368056  |
| O  | 3.8075613  | 2.1858488  | 0.1406167  | H | -2.9444746 | 5.2359757  | 1.7671290  |
| O  | -2.4543983 | -4.4256538 | -0.8582402 | H | 2.9940976  | 1.6990396  | -0.0734665 |
| O  | -3.6804721 | -2.9766077 | -2.7721414 | H | -2.0305882 | 2.9810000  | 4.5759896  |
| O  | 3.4942901  | 3.7508533  | -2.2891396 | H | 4.4882058  | 1.5924285  | -0.1825657 |
| O  | 4.3107870  | 1.6349941  | -3.7634595 | H | -2.3289018 | 3.4751057  | 3.1363152  |
| H  | -3.7302249 | 1.6588041  | -2.7564139 | H | -1.1745355 | 6.1636776  | 0.3109228  |
| H  | 2.5572382  | 3.9692398  | -2.3276792 | H | 1.5387947  | 3.3204026  | 2.7460383  |
| H  | -2.7711984 | 2.5906835  | -3.4890666 | H | -2.2877601 | 7.2403571  | 0.1831015  |
| H  | 3.6537637  | 3.4511628  | -1.3915143 | H | 0.0049938  | 3.3242858  | 3.1108339  |
| H  | -2.6234812 | 4.6249340  | -0.6374834 | H | 2.7115749  | -0.5663562 | 3.7041769  |
| H  | 5.0046933  | 1.8721816  | -4.3672854 | H | 2.8427013  | 0.9908035  | 3.4717396  |
| H  | -3.0236763 | 3.2952766  | -1.3748423 | H | 1.0259962  | 0.0605513  | 2.5888358  |
| H  | 4.0185078  | 2.4560461  | -3.3292585 | H | -0.5486130 | -0.0916615 | 2.4434848  |
| H  | 0.5630804  | 5.0699092  | -0.5473677 | H | -1.4901601 | 2.4756139  | -5.7064495 |
| H  | 0.2669078  | 3.3176751  | -2.3444399 | H | -1.5647711 | 0.2751534  | -4.9612916 |
| H  | 0.6266249  | 5.0633028  | 1.0016223  | H | 0.1869713  | 0.9334339  | -6.6193505 |
| H  | 0.3180731  | 4.6766761  | -3.0392883 | H | 1.2548695  | 1.3912639  | -5.2922500 |
| H  | -3.7805972 | -1.0280027 | -2.5497516 | H | 0.7659914  | -0.2871501 | -5.4995230 |
| H  | -3.0294386 | -0.1481582 | -1.5474110 |   |            |            |            |

Complex species: NpO<sub>2</sub>(Lac) with side-on  
coordinating ligand

C 0.2618919 -0.8286896 -2.9810659  
C -0.2378842 0.6006786 -3.1535032  
O 0.0199073 1.3044732 -1.9395131  
Np 0.1395017 0.0116128 0.2322971  
O 0.0643102 0.1057081 2.6885583  
O 0.3884608 -1.5239921 -3.9794234  
O 0.4677848 -1.2112487 -1.7926999  
O 1.9623355 0.1491497 0.4054360  
O -1.6639748 -0.1005388 0.1761607  
O 0.0139076 -2.3956934 0.8130408  
O 0.0065773 2.4535726 0.7034042  
O -2.5761747 -0.2871900 2.9664419  
O 2.6406629 -0.4305853 3.2268608  
O -0.0292582 3.3810036 3.2650945  
O 2.4348769 2.4026515 3.7826720  
O 3.3374294 2.4527397 1.0756609  
O -1.5505774 3.5437236 -1.3248628  
O -3.6636092 2.5494076 -2.6221435  
O -3.5237945 -0.0197983 -1.9013649  
O -2.8397490 4.2075692 1.3368424  
O -2.7785907 2.4711221 3.4116898  
O 3.1190465 -3.1263792 3.6022708  
O 2.1035478 -4.1363349 1.3322058  
O 2.1229544 -3.5356962 -1.3143505  
O 3.2700203 -2.3197071 -3.5002223  
O -0.5952940 -4.3034506 -1.1302794  
O -1.5211524 -3.5609337 -3.5217858  
O -3.2490139 -4.5097555 -0.3701054  
O -4.0172285 -2.7783578 -2.3049569  
O -0.8467441 5.8110197 2.3296648  
O 1.7078414 4.6079254 -4.4148995  
O 0.2942350 5.3671519 -2.2402097  
O 2.7043850 4.3357521 -0.9287626  
O 3.5400172 3.0243259 -3.0753384  
O 0.0051507 -5.7253656 2.3459288  
O -2.6499931 -4.8794878 2.3935993  
O -2.2552107 -2.8997810 4.0771709  
O 0.3823767 -3.7505979 4.4515933  
O 3.5587250 0.2038637 -2.1777296  
H -3.7072713 1.5930716 -2.4344204  
H 2.7193739 3.8075168 -0.1245694  
H -4.5572665 2.8730767 -2.6120259  
H 1.8154714 4.6671676 -1.0670917  
H -1.0943161 4.2912606 -1.7339219  
H 4.4562503 3.2181467 -3.2486389  
H -2.3548638 3.3136019 -1.8284617  
H 3.3007896 3.4995738 -2.2506966  
H 0.7328636 5.1523385 -3.0830074  
H 1.3837291 4.2718549 -5.2432545  
H -0.5016561 2.1158075 -1.8905006  
H 2.3816159 3.9875105 -4.0998273  
H -3.7983255 -0.9191054 -2.1084590  
H -2.9453371 -0.0862450 -1.1340742  
H 3.4896289 -1.4504473 -3.1475734  
H -3.2426192 -4.4972293 0.5901714  
H 2.4207861 -2.2011119 -3.9286920  
H -2.3382735 -4.7117883 -0.6046467  
H 1.5408604 -2.7723162 -1.4238276  
H -4.8145944 -3.1364521 -2.6810637  
H 2.7606288 -3.3966679 -2.0285295  
H -3.8078280 -3.3417666 -1.5351348

H -0.9082889 -4.0229648 -2.0159190  
H -0.9134957 -2.9034315 -3.8757574  
H 0.3176156 -4.5563002 -1.2719688  
H -2.3693847 -3.1389616 -3.3706925  
H 3.4744420 1.1008994 -2.5075064  
H 3.0325537 0.1482731 -1.3785733  
H -0.3721582 -2.9726428 0.1309111  
H 0.7630732 -2.8902195 1.1668877  
H -2.4287119 -1.9929315 3.8122891  
H 2.3000784 -4.0505675 0.3826552  
H -1.3251192 -2.9749436 4.3214809  
H 1.4838561 -4.8600229 1.4718494  
H -3.2713293 -5.4639447 2.8168825  
H 3.9092340 -3.5430476 3.9295245  
H -2.5635645 -4.1000908 2.9911353  
H 2.9049540 -3.5352787 2.7449761  
H 0.0131381 -6.6735675 2.4278410  
H 0.3461799 -4.5079142 3.8637612  
H -0.9255661 -5.4697086 2.2325200  
H 1.2879756 -3.4416960 4.4114964  
H -2.8108067 0.6284216 3.1666998  
H -2.5875524 -0.3545571 2.0071955  
H -0.6188583 2.9526814 0.1690495  
H -0.0036813 2.8085727 1.6095799  
H 2.5809955 1.4642899 3.9162943  
H -2.6137080 4.0139219 0.4268832  
H 2.8544833 2.5850119 2.9362357  
H -2.2585912 4.9291899 1.6114378  
H 2.8612509 1.6565390 0.7888735  
H -3.4141999 2.8066752 4.0360639  
H 4.2590525 2.2883751 0.8985077  
H -2.8693416 3.0254535 2.6119262  
H -0.7614670 6.5881589 2.8694637  
H 0.7946335 2.9947127 3.6159338  
H -0.4032482 5.0845811 2.7880294  
H -0.7877208 2.9224968 3.6341255  
H 2.9343910 -1.3208426 3.4596062  
H 2.7209441 -0.3591042 2.2719213  
H 0.8366878 -0.1894069 3.1878903  
H -0.7772116 -0.1559856 3.0856198  
H 0.2451652 6.3162405 -2.1870493  
H -1.3144746 0.5200651 -3.2863522  
C 0.3847391 1.2989633 -4.3380311  
H 0.2087416 0.7173253 -5.2326671  
H -0.0558782 2.2820935 -4.4625231  
H 1.4528295 1.4075234 -4.1936373

Complex species:  $\text{NpO}_2(\text{Lac})_2^-$  with two end-on  
coordinating ligands

C 1.9401480 -4.2386944 -2.1050476  
C 1.0663696 -3.1553203 -2.7039334  
C 0.4639055 -2.2806093 -1.6158640  
O -0.2479032 -2.8194972 -0.7265767  
Np -0.9449387 -0.4537782 0.1667347  
O -1.5939403 1.9001143 0.8384890  
O 1.8304766 -2.4276810 -3.6209390  
O 0.6413748 -1.0501597 -1.6296517  
O 0.3247366 -0.5304051 1.4490001  
O -2.4712001 -1.8328825 1.4936110  
O -2.2586277 -0.3956227 -1.0711505  
O 0.0164251 1.7331013 -0.6126143  
O 1.1845249 4.8611470 -2.7421198  
O 1.4956233 2.5905863 -4.3469258  
O 0.2981978 -0.1842756 -4.3246984  
O 2.8117775 3.6211801 1.4971561  
O 0.3370779 1.0918112 4.0339043  
O -4.2182194 -3.6458570 0.3146080  
O -2.4589317 -4.4371216 -1.4849508  
O 4.2024577 1.3928214 2.4772189  
O 2.5098011 3.0006985 4.2385741  
O -1.4087545 -3.3158540 3.5135189  
O -1.6940896 -0.7862410 4.8403387  
O -2.3657603 -0.7681591 -3.9028907  
O 0.3566947 -4.2691211 1.7973222  
O 2.8686407 -3.6333531 2.7538131  
O 3.7960200 -0.6255880 -2.6010737  
O 2.6096066 1.7016648 -1.9380505  
O -5.7657185 -2.4201624 -1.7002293  
O -3.9433536 -3.1414866 -3.5276475  
O 4.0056141 5.1968224 -2.7992525  
O -1.9001952 2.5999737 3.5491442  
O 4.4808907 3.3179702 -0.7661707  
O -4.9847170 -0.1746266 -0.2679262  
O -4.4214064 2.0023006 1.2871045  
O -5.6229602 -1.2816150 2.2400968  
O -3.9414145 0.4778591 3.7172786  
O 6.0714296 1.2510031 0.4036523  
O 5.1216591 -1.1412227 -0.1890458  
O 3.0804962 -1.1217357 1.7246652  
H -0.6487124 -0.3710893 -4.4002789  
H 5.6282555 1.3669379 1.2541857  
H 0.4318187 -0.0779840 -3.3810346  
H 5.7403280 1.9804314 -0.1343375  
H 2.0042771 2.2529032 -3.6002494  
H 5.8000600 -1.7895192 -0.0324386  
H 0.9949909 1.8359510 -4.6569927  
H 5.5344500 -0.2581719 -0.0382156  
H 2.9477938 0.8043372 -2.1120098  
H 3.2225677 -1.3194845 -2.9379884  
H 1.7855491 1.6458067 -1.4460711  
H 4.2924736 -0.9807284 -1.8597738  
H -2.8746884 -1.5802339 -3.9493994  
H -2.4039835 -0.5083710 -2.9781984  
H 3.0146470 -2.7199223 2.4574767  
H -5.7763864 -1.4996714 -1.4223998  
H 2.9704769 -3.6265106 3.6991445  
H -5.4109963 -2.8822008 -0.9328828  
H 0.2452116 -3.8610429 0.9360764  
H -4.3593496 -3.6054014 -4.2462276  
H 1.2697052 -4.1078271 2.0776631

H -4.6627578 -2.8287519 -2.9405127  
H -3.5769109 -4.0779120 -0.2913997  
H -1.6480931 -3.9610340 -1.2739169  
H -4.5471735 -4.2999896 0.9217338  
H -2.8189508 -4.0466652 -2.2889466  
H 3.6447439 -1.1582539 0.9407720  
H 2.1768931 -0.9046665 1.4639543  
H -3.1841049 -2.3591420 1.1025888  
H -2.1951597 -2.2930353 2.3008348  
H -3.5243174 2.1802148 0.9980870  
H -0.7145404 -3.7000031 2.9312356  
H -4.3107545 1.5994929 2.1543663  
H -1.8427321 -4.0397329 3.9514081  
H -4.0881932 -0.2825204 -0.6067772  
H -0.9156726 -0.2256275 4.7678424  
H -4.9684477 0.6968140 0.1585525  
H -1.4432887 -1.6417848 4.4876310  
H -6.5648249 -1.1596824 2.2905997  
H -4.5325638 -0.1920011 3.3586075  
H -5.3744729 -1.0273585 1.3401304  
H -3.1980884 -0.0014776 4.1110169  
H 2.1113101 5.1243675 -2.7964008  
H 1.0925600 4.1458570 -3.3831285  
H 1.7683358 2.3900214 4.3065490  
H 4.3219458 4.7553585 -3.5807300  
H 3.2681495 2.4376128 4.0832387  
H 4.2878875 4.6418264 -2.0590351  
H 3.6400796 2.0105428 1.9945414  
H -2.7021918 2.1597967 3.8311906  
H 3.7932504 0.5266933 2.3806679  
H -1.8850237 2.4927880 2.5937172  
H 3.8102881 2.7352390 -1.1630718  
H 2.5938741 3.7438792 2.4280445  
H 4.0938042 3.6061852 0.0670568  
H 2.0525093 3.9000881 0.9648448  
H -0.4213093 1.6874212 3.9157372  
H 0.4483787 0.6414708 3.1935943  
H 1.2919766 -1.7454943 -4.0469489  
H 0.2176142 -3.6234038 -3.2035507  
H 2.3251578 -4.8652482 -2.8993136  
H 2.7809360 -3.7983477 -1.5803706  
H 1.3775530 -4.8494148 -1.4118862  
C -0.7050081 2.4362026 0.1105622  
C -0.5656282 3.9465977 0.1537034  
O 0.7288577 4.3590584 -0.1508717  
C -1.6135830 4.5834553 -0.7466818  
H -0.7611446 4.2362310 1.1814253  
H 0.8577230 4.4914000 -1.1129316  
H -1.5388138 5.6610177 -0.6705252  
H -1.4490151 4.3050032 -1.7809525  
H -2.6113691 4.2807188 -0.4518024



Complex species:  $\text{NpO}_2(\text{Lac})_2^-$  with two side-on  
coordinating ligands

C 2.2046226 -2.6466012 -3.6299923  
C 1.3651267 -1.5643699 -2.9926975  
O 1.7361709 -1.3283387 -1.6426064  
Np 0.0187592 -0.2864540 -0.0955737  
O 0.1672656 1.2083055 -1.1036509  
C -0.1227552 -1.8958606 -3.0010991  
O -0.7870252 -1.5271939 -1.9931114  
O -0.5908013 -2.4612264 -3.9856442  
O -2.4656108 0.1146475 -0.2260379  
C -3.1591028 0.9103272 0.7207377  
C -2.1400167 1.4503953 1.7229875  
O -2.5492772 2.2554906 2.5781910  
O 2.2120681 0.1414994 0.9021058  
O -0.9703040 1.0353269 1.6330892  
O -0.0794969 -1.8173448 0.9238303  
C -3.9409149 2.0196932 0.0507950  
O 2.2588378 0.7391717 3.5138322  
O 4.0474651 1.6573499 -0.3522441  
O 2.8125664 3.3495259 -2.0641743  
O 1.7760340 3.2045605 2.4831899  
O 0.8246339 -1.2081268 4.7384865  
O -0.4932114 4.3094968 3.5053665  
O 4.5060733 3.2949481 2.0889079  
O 4.8614053 1.3590690 4.1120247  
O -1.3893505 -2.2756001 3.4972388  
O -4.1018595 -1.7910658 3.4101611  
O -3.8843176 -0.2197017 -2.5883040  
O -2.5475225 -0.6917422 -4.8557054  
O 0.9568145 1.8907452 -3.6701652  
O -3.5816031 4.7617586 1.9234699  
O -3.8236069 2.4158494 -3.5174177  
O -1.6043706 2.0156037 -5.0876507  
O -4.2679628 0.9152912 4.3204929  
O -0.9883265 5.6900742 1.1232134  
O 1.6393115 -3.0626194 2.5956456  
O 3.9793528 -3.1025386 1.2971473  
O 3.4113639 -4.7775547 -0.7710030  
O 5.4301753 -3.5104053 -2.2163041  
O 4.3938007 -1.2085481 -0.9566782  
O 0.7682556 3.7823958 -0.0800431  
O -4.8397131 -2.1229528 0.6906762  
O -3.2951817 -2.8051220 -1.4910824  
O -1.6756591 -4.8339010 -2.5287768  
O 0.3818297 -4.3904938 -0.5613640  
H 2.2817132 2.9706967 -2.7728552  
H 3.1489152 -3.0750891 1.8131083  
H 2.1762616 3.7288951 -1.4478810  
H 4.6936954 -3.1157232 1.9252051  
H 4.4750423 0.9144899 -0.7791701  
H 3.3681123 -5.6961460 -0.5254481  
H 3.6783978 2.2381515 -1.0475509  
H 3.6562171 -4.2813653 0.0265721  
H 4.8991628 -1.8778492 -1.4337654  
H 5.4143667 -3.5959700 -3.1632375  
H 2.6932375 -1.2134344 -1.5344221  
H 4.7349544 -4.0870669 -1.8760142  
H 0.1853274 2.0390693 -4.2203583  
H 0.6084014 1.6127111 -2.8157065  
H -0.9669330 -4.8160598 -1.8766719  
H -3.7998463 3.0019388 -2.7680580  
H -1.3866890 -4.2313107 -3.2169154

H -4.0815031 1.5540755 -3.1691023  
H -2.4836368 -2.2981935 -1.6187105  
H -1.7222880 2.4973694 -5.8992896  
H -3.0272138 -3.6862230 -1.7806873  
H -2.3592409 2.2484467 -4.5221810  
H -3.3672624 -0.4281113 -3.3963606  
H -1.9057741 -1.3938269 -4.6892438  
H -4.2707066 -1.0580949 -2.3332633  
H -2.0526234 0.0943018 -5.0972702  
H 1.3193661 -4.3407723 -0.7448282  
H 0.1499408 -3.5658995 -0.1255646  
H -2.9500946 0.0425930 -1.0643536  
H -0.4811179 5.1191577 0.5358566  
H -4.2143360 -2.4104613 0.0068445  
H -1.9087307 5.4247473 1.0703023  
H -5.6430069 -2.6031299 0.5239050  
H -4.2881519 -0.8833483 3.6697787  
H -4.3969881 -1.9021219 2.5005677  
H -3.6224720 5.2750198 2.7238136  
H -3.3043871 3.8779808 2.1982743  
H 1.1520687 3.5616147 0.7818477  
H 0.4186691 2.9479774 -0.4091131  
H 2.8264946 0.7745052 0.4838607  
H 2.2704399 0.2745403 1.8684967  
H -0.0857342 -1.4127954 4.4798033  
H 4.5196333 2.8093436 1.2611331  
H 1.3205899 -1.8884261 4.2839472  
H 4.8365095 2.6867871 2.7567795  
H 1.0358705 -2.5539367 2.0198737  
H 1.1653236 3.7519408 2.9995311  
H 1.1424109 -3.8405731 2.8355627  
H 2.6852471 3.5324712 2.5027945  
H 5.3983955 0.5855866 4.2334857  
H 1.6228467 0.2134193 4.0285025  
H 3.9446089 1.0542584 4.0297142  
H 1.8875799 1.6126031 3.3058753  
H -2.3504631 -2.1680357 3.5600396  
H -1.1719375 -2.0830297 2.5837501  
H 4.2331115 -1.5879913 -0.0882281  
H 1.4654759 -0.6371506 -3.5548308  
H 1.8389191 -2.8417787 -4.6287034  
H 3.2397881 -2.3287801 -3.6885508  
H 2.1520720 -3.5625350 -3.0533665  
H -3.8409286 0.2711382 1.2746003  
H -4.4942044 2.5891625 0.7832043  
H -3.2689201 2.6959232 -0.4681499  
H -4.6445000 1.5982452 -0.6574347  
H -0.6683045 4.9075562 2.7652612  
H -3.8544964 0.9186415 5.1774048  
H -1.0549267 3.5463351 3.3471109  
H -3.7051310 1.4670980 3.7615778

Complex species:  $\text{NpO}_2(\text{Lac})_2^-$  with one end-on  
and one side-on coordinating ligand

C -3.8752164 2.0163663 0.0423871  
C -3.1577823 0.8795921 0.7380404  
C -2.1169417 1.3825981 1.7376238  
O -2.4954934 2.2074572 2.5869970  
O -2.5083033 0.0273936 -0.1925602  
Np -0.0391306 -0.4690369 -0.0533123  
O 0.1837877 1.0027354 -1.0717760  
O 1.3176951 -1.8062616 -1.6814775  
O 2.2394556 -0.1700949 0.8502890  
O -0.8171334 -1.6786731 -2.1172278  
O -0.9653308 0.9193668 1.6507237  
O -0.2239634 -1.9871709 0.9614806  
O 2.2480033 0.4857924 3.4084870  
O 4.0302517 1.3518885 -0.3591758  
O 2.8488358 3.0606381 -2.1233621  
O 1.8437602 2.9880501 2.4485333  
O 0.7482018 -1.3694604 4.6850645  
O -0.3676781 4.1946137 3.4968739  
O 4.5526227 2.9844498 2.0401093  
O 4.9478858 0.8594598 3.8813528  
O -1.5741661 -2.3076241 3.5271649  
O -4.2755844 -1.7271426 3.3308383  
O -3.9211523 -0.2442482 -2.5584174  
O -2.4485301 -0.7844531 -4.7216564  
O 0.8974829 1.6631375 -3.6991792  
O -3.4573440 4.7434656 1.9358693  
O -3.9300800 2.3643190 -3.5273525  
O -1.6847559 1.9341085 -5.0297082  
O -4.3556628 0.9711299 4.2595521  
O -0.8347876 5.5656601 1.1006607  
O 1.4790749 -3.3892435 2.6804032  
O 3.4726498 -2.6849197 0.8352326  
O 2.9009989 -4.4639273 -1.0968559  
O 4.3942719 -2.9601962 -2.9721463  
O 5.2952350 -1.0919169 -0.9918673  
O 0.8360405 3.5947801 -0.1048270  
O -4.9760792 -2.0900443 0.5890971  
O -3.4095457 -2.8746486 -1.5642618  
O -1.9272374 -5.0012923 -2.5524401  
O 0.0331618 -4.5932885 -0.5740115  
H 2.2950336 2.6875904 -2.8166498  
H 3.0365295 -3.0417304 1.6167237  
H 2.2363214 3.4725992 -1.5054266  
H 3.0514457 -1.8220848 0.7126628  
H 4.5856363 0.6586886 -0.7369594  
H 3.2960754 -5.2662448 -0.7704100  
H 3.6936241 1.9159115 -1.0804655  
H 3.0834350 -3.7812360 -0.4178508  
H 5.0081696 -1.5948339 -1.7609738  
H 5.0598462 -3.5418198 -3.3223154  
H 3.8039645 -3.5112498 -2.4438407  
H 0.0938773 1.8956299 -4.1666082  
H 0.6078693 1.3448029 -2.8381951  
H -1.2539103 -4.9912095 -1.8596544

H -3.9343924 2.9722378 -2.7951844  
H -1.5795879 -4.4304943 -3.2384083  
H -4.1551180 1.5012677 -3.1576868  
H -2.5766361 -2.4134864 -1.6994202  
H -1.7694951 2.3871520 -5.8616536  
H -3.1902080 -3.7735398 -1.8410382  
H -2.4548792 2.1922296 -4.4957916  
H -3.3663248 -0.4884849 -3.3297036  
H -1.7917678 -1.4462237 -4.4903536  
H -4.3747736 -1.0538711 -2.3245428  
H -1.9873739 0.0302196 -4.9396812  
H 0.9668613 -4.5443563 -0.7954895  
H -0.1558881 -3.7995978 -0.0680150  
H -2.9985847 -0.0241326 -1.0284347  
H -0.3539177 4.9711061 0.5140878  
H -4.3378593 -2.4098473 -0.0654407  
H -1.7646549 5.3354654 1.0557613  
H -5.7538122 -2.6242696 0.4713943  
H -4.4400318 -0.8148619 3.5893938  
H -4.5483320 -1.8283859 2.4138425  
H -3.4611773 5.2669618 2.7306373  
H -3.1989571 3.8553435 2.2142408  
H 1.2269832 3.3697731 0.7530764  
H 0.4688741 2.7655540 -0.4255695  
H 2.8469185 0.4570165 0.3893345  
H 2.2817542 0.0354381 1.8129154  
H -0.1798102 -1.5231049 4.4585286  
H 4.5262989 2.5247464 1.1964253  
H 1.1896444 -2.1161950 4.2794849  
H 4.8809209 2.3381063 2.6729033  
H 0.8444509 -2.9190398 2.1177541  
H 1.2663538 3.5609416 2.9743520  
H 1.0436396 -4.1994995 2.9273017  
H 2.7700212 3.2696084 2.4631498  
H 5.4033747 0.0569638 3.6533515  
H 1.6086040 -0.0239762 3.9379946  
H 4.0036541 0.6482417 3.8569824  
H 1.9140392 1.3829417 3.2409848  
H -2.5299592 -2.1582688 3.5565765  
H -1.3223859 -2.1638243 2.6138982  
H 5.0628473 -1.6416360 -0.2454388  
H -3.8755334 0.2903488 1.3008641  
H -4.3837708 2.6409614 0.7621842  
H -3.1674823 2.6311575 -0.5046993  
H -4.6123952 1.6183227 -0.6449693  
H -0.5244015 4.7899852 2.7506968  
H -3.9795204 0.9380293 5.1329483  
H -0.9550070 3.4493017 3.3485360  
H -3.7354819 1.4909830 3.7315564  
C 0.3468434 -2.0290712 -2.4223181  
C 0.6269599 -2.7162170 -3.7412215  
C 1.5284932 -1.8586451 -4.6076413  
O -0.6141214 -3.0020153 -4.3773894  
H -0.4366401 -3.2988895 -5.2650231  
H 1.1282285 -3.6494843 -3.4985992  
H 1.6790976 -2.3381025 -5.5717710  
H 1.1054155 -0.8725539 -4.7611306  
H 2.4938736 -1.7510090 -4.1328625
